# Supplementary material for: A very limited role of tropospheric chlorine as a sink of the greenhouse gas methane
Source: Copernicus journal article supplement (doi:10.5194/acp-2018-188), 2018-02-21
Supplement: Supplementary file 1 [file acp-2018-188-supplement.pdf]

**Supplement to**

**A very limited role of tropospheric chlorine as a sink of the greenhouse gas methane**

S. Gromov, C. A. M. Brenninkmeijer and P. Jöckel

*Correspondence to:* S. Gromov ([sergey.gromov@mpic.de](mailto:sergey.gromov@mpic.de))

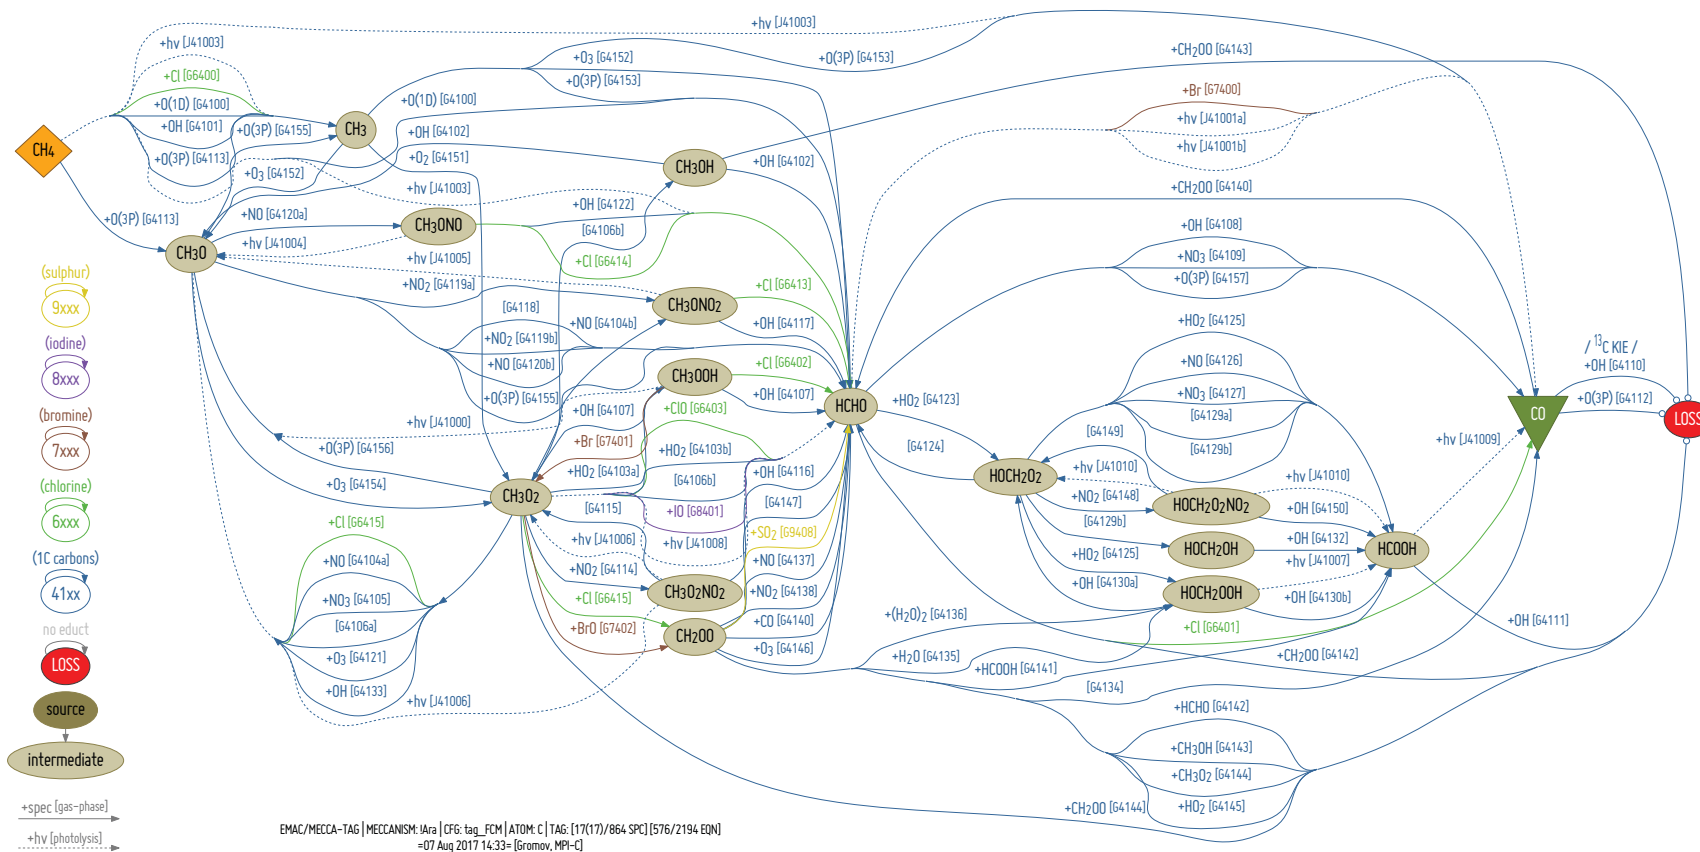

Fig. S1 Diagram of reaction pathways (following C exchanges) between CH<sub>4</sub> and CO as simulated in MECCA (the kinetic chemistry submodel used in EMAC, see Sect. 2.3 of the manuscript for details). Each arrow denotes a single gas-phase (solid line) or photolysis (dashed line) reaction; caption lists the reaction partner and label; colours refer to the chemical mechanism groups defined in MECCA. Pathways ending at the loss reservoir remove C from the CH<sub>4</sub> → CO conversion chain. Note that non-chemical removal of C from the system (e.g. dry/wet deposition of CH<sub>3</sub>O<sub>2</sub>, CH<sub>3</sub>OH, HCHO, HCOOH intermediates) is not shown, however, simulated by the model. See Supplement to Lelieveld *et al.* (2016) (p. S18, <https://www.atmos-chem-phys.net/16/12477/2016/acp-16-12477-2016-supplement.pdf>) for the complete listing of the respective MECCA reaction mechanism.

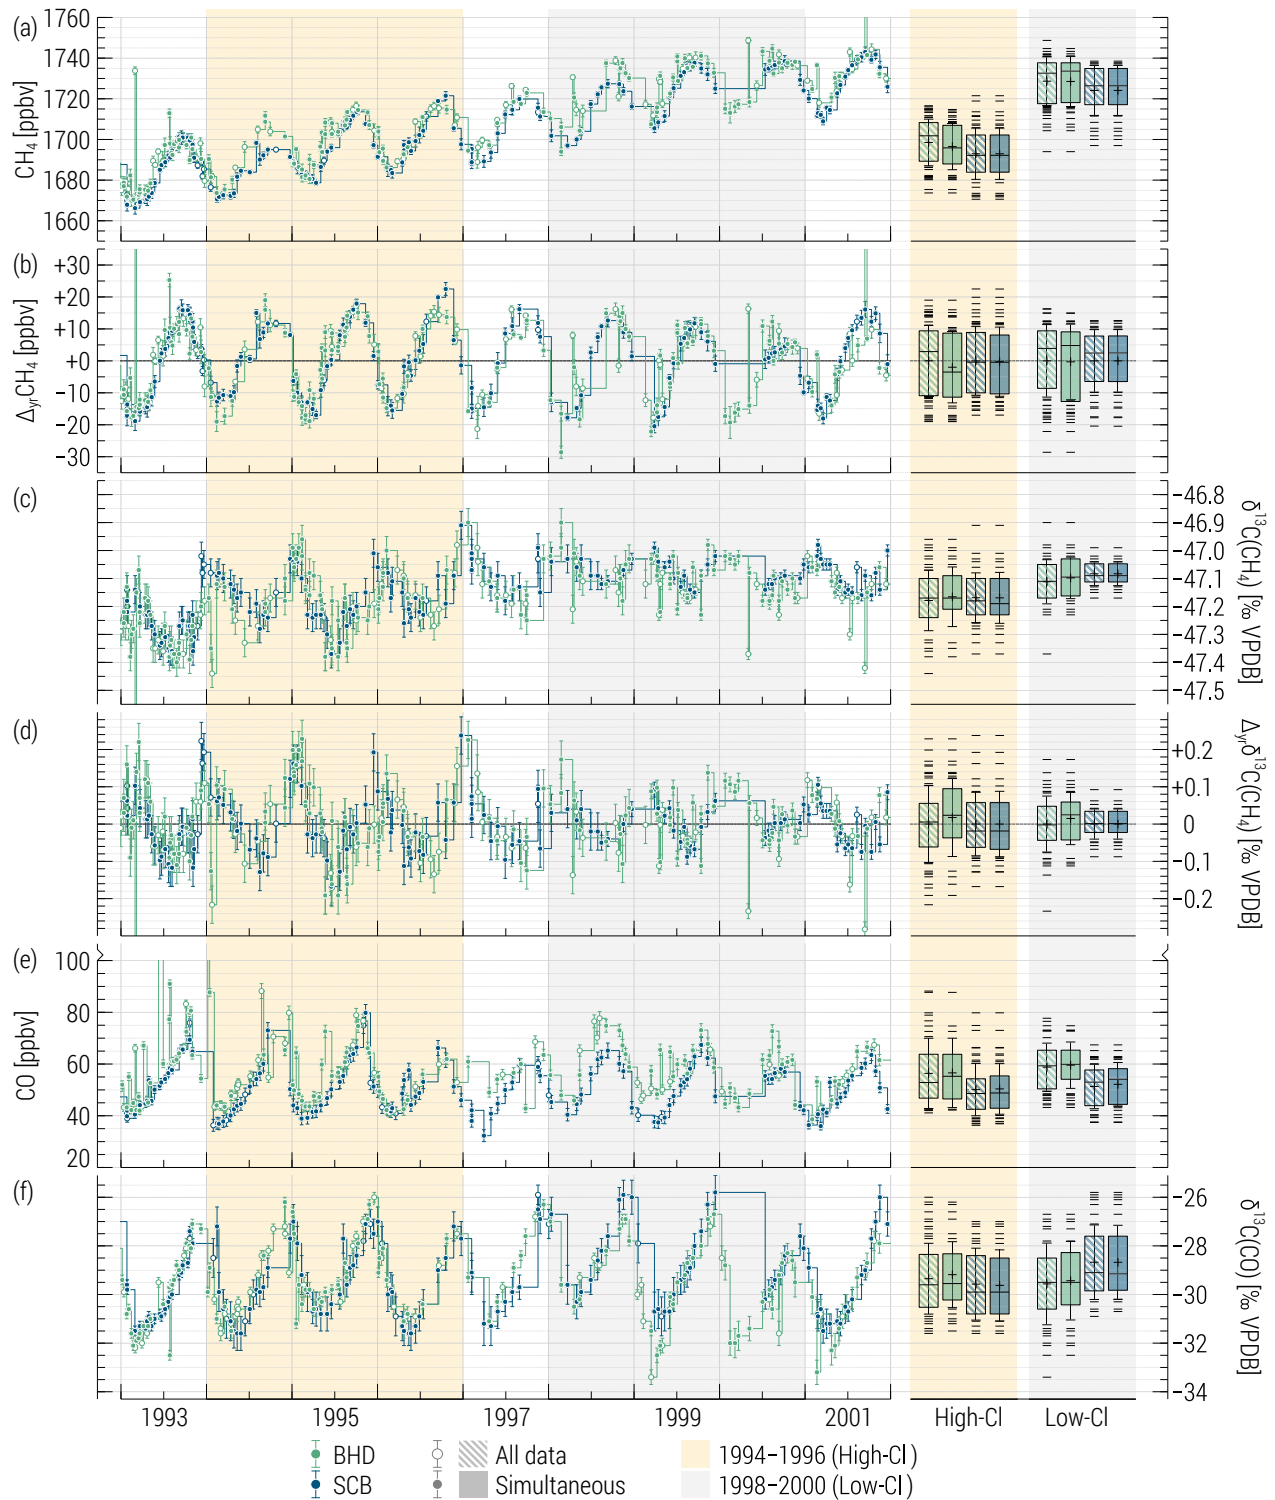

Fig. S2 Time series (left) and statistics (right, box-and-whisker plots) of the observations from Baring Head (BHD) and Scott Base (SCB) scrutinised in this study. Panels (a, c) present the mixing ratios and  $\delta^{13}\text{C}$  of CH<sub>4</sub>; panels (b, d) show anomalies with respect to the annual averages (denoted with “ $\Delta_{\text{yr}}$ ”). Panels (e, f) display the mixing ratios and  $\delta^{13}\text{C}$  of CO. The number of samples in each subset is presented in the manuscript (Fig. 1, panel (g)). Shaded areas denote the ETSH MBL high-Cl (orange shaded) and low-Cl (grey shaded) periods hypothesised by A07 (see text for details). Step lines navigate through the entire time series at each station. Boxes and whiskers present the median/interquartile range and  $\pm 1\sigma$  (of the population) of the selected data. Plus and minus symbols denote the averages and samples falling outside  $\pm 1\sigma$ , respectively. Solid symbols/boxes refer to the data when CH<sub>4</sub> and CO samples were taken simultaneously (up to 7 days apart); hollow symbols/hatched boxes refer to all data.

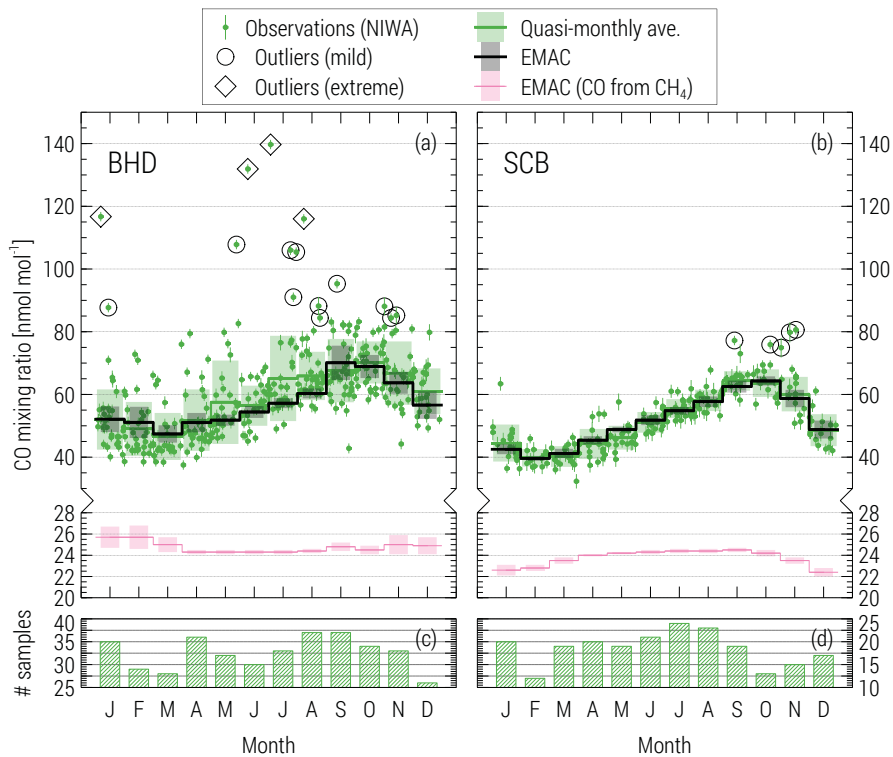

Fig. S3 Seasonal cycles CO mixing ratio at Baring Head (BHD, panel **a**) and Scott Base (SCB, panel **b**). Observations (entire data series plotted against day of year) are shown with symbols; circles and diamonds denote mild and extreme outliers (see Sect. 2.2 of the manuscript for details). Step lines refer to quasi-monthly averages derived from the observations (green) and from the EMAC model (1996–2005) for total CO (black) and its component derived from CH<sub>4</sub> oxidation (thin red line, lower scale). Vertical bars indicate measurement uncertainty (for observations) and  $\pm 1\sigma$  (standard deviation of the subsample used for quasi-monthly averages). Panels (c, d) show the number of samples in observational data. Mind the breaks and different scales of the ordinate axes.

Table S1 Annual average CO- and CH<sub>4</sub>-related integrals by domain simulated in EMAC for 1996–2005.

| domain               |           | zonal                                              |                                              |       |       |       |       | vertical                                                       |                                       |                            |       |       |       |  |  |
|----------------------|-----------|----------------------------------------------------|----------------------------------------------|-------|-------|-------|-------|----------------------------------------------------------------|---------------------------------------|----------------------------|-------|-------|-------|--|--|
|                      |           | GLOB                                               | ETNH                                         | IT    | ETSH  | AR    | AN    | GLOB                                                           | ETNH                                  | IT                         | ETSH  | AR    | AN    |  |  |
|                      |           | CO burden [Tg(C)]                                  |                                              |       |       |       |       | Fraction of CO from CH <sub>4</sub> oxidation   $\gamma$ [C/C] |                                       |                            |       |       |       |  |  |
| SRF                  |           | 1.80                                               | 0.70                                         | 0.86  | 0.24  | 0.09  | 0.03  | 24.6%                                                          | 17.1%                                 | 25.2%                      | 44.8% | 19.3% | 46.0% |  |  |
| BL                   |           | 12.71                                              | 5.07                                         | 5.87  | 1.77  | 0.52  | 0.19  | 25.7%                                                          | 17.5%                                 | 27.2%                      | 44.5% | 18.9% | 45.8% |  |  |
| MBL                  |           | 6.39                                               | 1.67                                         | 3.31  | 1.40  | 0.20  | 0.05  | 32.5%                                                          | 19.9%                                 | 33.5%                      | 45.2% | 19.0% | 45.8% |  |  |
| FT                   |           | 135.7                                              | 46.82                                        | 68.13 | 20.75 | 7.45  | 2.42  | 29.5%                                                          | 21.2%                                 | 31.0%                      | 43.6% | 20.1% | 45.4% |  |  |
| T                    |           | 151.30                                             | 53.09                                        | 75.23 | 22.98 | 8.13  | 2.67  | 29.2%                                                          | 20.7%                                 | 30.6%                      | 43.7% | 20.0% | 45.5% |  |  |
| TP                   |           | 4.89                                               | 2.14                                         | 1.67  | 1.08  | 0.48  | 0.19  | 30.5%                                                          | 23.9%                                 | 32.8%                      | 40.3% | 21.8% | 43.6% |  |  |
| LMS                  |           | 15.64                                              | 6.71                                         | 4.25  | 4.68  | 1.45  | 0.84  | 40.7%                                                          | 33.3%                                 | 44.7%                      | 47.5% | 30.5% | 49.5% |  |  |
|                      |           | Cl concentration [atoms cm <sup>-3</sup> ]         |                                              |       |       |       |       | Yield of CO from CH <sub>4</sub> oxidation   $\lambda$ [C/C]   |                                       |                            |       |       |       |  |  |
| SRF                  |           | 97                                                 | 56                                           | 145   | 47    | 8     | 10    | 72%                                                            | 72%                                   | 74%                        | 62%   | 48%   | 51%   |  |  |
| BL                   |           | 100                                                | 59                                           | 152   | 51    | 8     | 11    | 81%                                                            | 83%                                   | 81%                        | 73%   | 55%   | 62%   |  |  |
| MBL                  |           | 110                                                | 59                                           | 165   | 49    | 8     | 9     | 47%                                                            | 41%                                   | 45%                        | 63%   | 103%  | 257%  |  |  |
| FT                   |           | 269                                                | 163                                          | 352   | 152   | 36    | 42    | 96%                                                            | 97%                                   | 95%                        | 96%   | 98%   | 107%  |  |  |
| T                    |           | 261                                                | 157                                          | 345   | 146   | 35    | 40    | 93%                                                            | 95%                                   | 93%                        | 93%   | 96%   | 104%  |  |  |
| TP                   |           | 3151                                               | 1415                                         | 4945  | 1418  | 299   | 506   | 123%                                                           | 119%                                  | 128%                       | 121%  | 120%  | 120%  |  |  |
| LMS                  |           | 16172                                              | 15892                                        | 15630 | 17260 | 15301 | 20021 | 102%                                                           | 103%                                  | 101%                       | 103%  | 103%  | 102%  |  |  |
|                      |           | CH <sub>4</sub> sink   S [Tg(C) yr <sup>-1</sup> ] |                                              |       |       |       |       | (via OH) [C/C]                                                 |                                       |                            |       |       |       |  |  |
| SRF                  |           | 7.0                                                | 1.1                                          | 5.2   | 0.69  | 0.01  | 0.01  | 99.9%                                                          | 99.9%                                 | 99.9%                      | 99.8% | 99.8% | 99.8% |  |  |
| BL                   |           | 49.2                                               | 7.9                                          | 36.1  | 5.1   | 0.07  | 0.06  | 99.9%                                                          | 99.9%                                 | 99.9%                      | 99.8% | 99.8% | 99.8% |  |  |
| MBL                  |           | 32.7                                               | 2.9                                          | 25.9  | 3.9   | 0.03  | 0.01  | 99.9%                                                          | 99.9%                                 | 99.9%                      | 99.8% | 99.8% | 99.8% |  |  |
| FT                   |           | 313.8                                              | 49.5                                         | 227.8 | 36.5  | 2.22  | 1.01  | 99.7%                                                          | 99.7%                                 | 99.7%                      | 99.7% | 99.7% | 99.6% |  |  |
| T                    |           | 372.7                                              | 59.2                                         | 270.6 | 42.8  | 2.32  | 1.09  | 99.7%                                                          | 99.7%                                 | 99.7%                      | 99.7% | 99.7% | 99.6% |  |  |
| TP                   |           | 1.83                                               | 0.59                                         | 0.74  | 0.50  | 0.07  | 0.05  | 90.9%                                                          | 94.2%                                 | 86.4%                      | 93.7% | 97.8% | 96.5% |  |  |
| LMS                  |           | 20.2                                               | 5.5                                          | 9.1   | 5.59  | 0.67  | 0.67  | 53.4%                                                          | 58.7%                                 | 47.9%                      | 57.1% | 64.7% | 60.4% |  |  |
|                      |           | (via O <sup>1</sup> D) [C/C]                       |                                              |       |       |       |       | (via Cl) [C/C]                                                 |                                       |                            |       |       |       |  |  |
| SRF                  |           | 0.01%                                              | 0.01%                                        | 0.01% | 0.01% | 0.02% | 0.04% | 0.13%                                                          | 0.11%                                 | 0.13%                      | 0.14% | 0.14% | 0.19% |  |  |
| BL                   |           | 0.01%                                              | 0.02%                                        | 0.01% | 0.01% | 0.02% | 0.05% | 0.13%                                                          | 0.12%                                 | 0.13%                      | 0.15% | 0.15% | 0.19% |  |  |
| MBL                  |           | 0.01%                                              | 0.01%                                        | 0.01% | 0.01% | 0.02% | 0.03% | 0.14%                                                          | 0.13%                                 | 0.14%                      | 0.15% | 0.15% | 0.18% |  |  |
| FT                   |           | 0.07%                                              | 0.08%                                        | 0.07% | 0.07% | 0.06% | 0.09% | 0.25%                                                          | 0.24%                                 | 0.25%                      | 0.27% | 0.22% | 0.30% |  |  |
| T                    |           | 0.06%                                              | 0.07%                                        | 0.06% | 0.06% | 0.06% | 0.09% | 0.23%                                                          | 0.22%                                 | 0.23%                      | 0.25% | 0.22% | 0.29% |  |  |
| TP                   |           | 1.94%                                              | 1.13%                                        | 3.20% | 1.05% | 0.38% | 0.40% | 7.2%                                                           | 4.7%                                  | 10.4%                      | 5.2%  | 1.8%  | 3.1%  |  |  |
| LMS                  |           | 38.0%                                              | 26.8%                                        | 40.3% | 27.1% | 8.6%  | 18.4% | 13.7%                                                          | 14.6%                                 | 11.8%                      | 15.8% | 16.7% | 21.2% |  |  |
| Domain abbreviations | zonal:    | GLOB                                               | Globe (90°S–90°N)                            |       |       |       | NH/SH | Northern/Southern Hemisphere                                   |                                       |                            |       |       |       |  |  |
|                      |           | IT/ET                                              | Intra/Extra-Tropics (separated at 23.4 N/ S) |       |       |       | AR/AN | Arctic/Antarctic (above 66 N/ S)                               |                                       |                            |       |       |       |  |  |
|                      | vertical: | SRF/TP                                             | Surface (lowest model layer)                 |       |       |       |       |                                                                | T                                     | Troposphere (below the TP) |       |       |       |  |  |
|                      |           | (M)BL                                              | (Marine) Boundary Layer                      |       |       |       | FT    | Free Troposphere (above the BL, below the TP)                  |                                       |                            |       |       |       |  |  |
|                      | TP        | Tropopause                                         |                                              |       |       |       |       | LMS                                                            | Lowermost Stratosphere (above the TP) |                            |       |       |       |  |  |
